# Supplementary material
Source: PubMed Central journal article supplement (PMC2814203)
Supplement: mmc1.pdf [file mmc1.pdf]

Biophysical Journal, Volume 98

**Supporting Material**

**Electrostatic solvation energy for two oppositely charged ions in a solvated protein system: salt bridges can stabilize proteins**

Haipeng Gong and Karl F. Freed

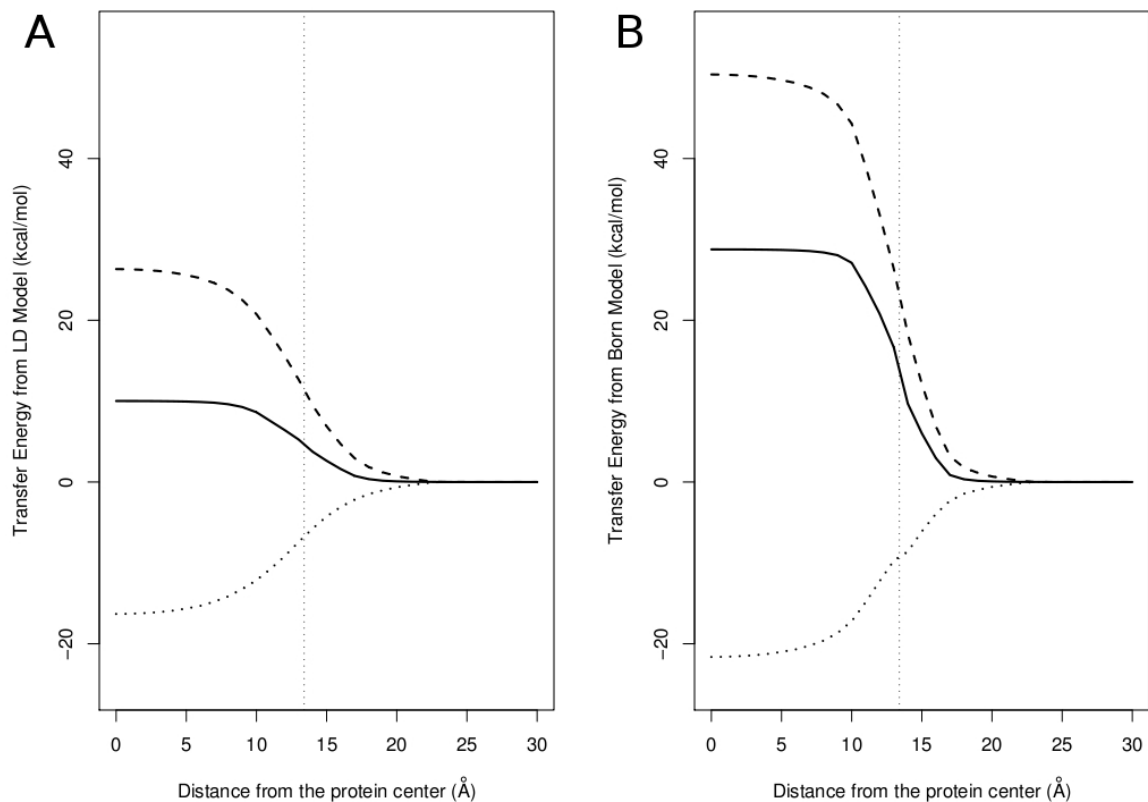

Suppl. Fig. 1 Decomposition of the transfer free energies (solid lines) into contributions from self-energies (dashed lines) and interaction energies (dotted lines) as calculated from (A) the LD and (B) the Born models. The vertical thin dotted line represents the location of the boundary between the protein and water.
